# Supplementary material for: Antenatal maternal low protein diet: ACE-2 in the mouse lung and sexually dimorphic programming of hypertension
Source: PubMed Central journal article supplement (PMC4430899; doi:10.1186/s12899-015-0016-6), 2015-05-14
Supplement: 12899_2015_16_MOESM1_ESM.pdf [file 12899_2015_16_MOESM1_ESM.pdf]

Supplemental Table 1

Normal Diet - 10% Fat & 18% Protein

**NUTRITIONAL PROFILE** <sup>1</sup>

|                                     |             |                               |       |
|-------------------------------------|-------------|-------------------------------|-------|
| <b>Protein, %</b>                   | <b>18.0</b> | <b>Minerals</b>               |       |
| Arginine, %                         | 0.69        | Calcium, %                    | 0.52  |
| Histidine, %                        | 0.50        | Phosphorus, %                 | 0.56  |
| Isoleucine, %                       | 0.94        | Phosphorus (available), %     | 0.56  |
| Leucine, %                          | 1.69        | Potassium, %                  | 0.36  |
| Lysine, %                           | 1.42        | Magnesium, %                  | 0.05  |
| Methionine, %                       | 1.00        | Sodium, %                     | 0.12  |
| Cystine, %                          | 0.07        | Chloride, %                   | 0.21  |
| Phenylalanine, %                    | 0.94        | Fluorine, ppm                 | 0.0   |
| Tyrosine, %                         | 0.99        | Iron, ppm                     | 35    |
| Threonine, %                        | 0.76        | Zinc, ppm                     | 35    |
| Tryptophan, %                       | 0.22        | Manganese, ppm                | 59    |
| Valine, %                           | 1.12        | Copper, ppm                   | 6.0   |
| Alanine, %                          | 0.54        | Cobalt, ppm                   | 0.0   |
| Aspartic Acid, %                    | 1.26        | Iodine, ppm                   | 0.21  |
| Glutamic Acid, %                    | 4.00        | Chromium, ppm                 | 2.0   |
| Glycine, %                          | 0.38        | Molybdenum, ppm               | 0.00  |
| Proline, %                          | 2.31        | Selenium, ppm                 | 0.11  |
| Serine, %                           | 1.08        |                               |       |
| Taurine, %                          | 0.00        | <b>Vitamins</b>               |       |
| <b>Fat, %</b>                       | <b>10.1</b> | Vitamin A, IU/g               | 4.0   |
| Cholesterol, ppm                    | 0           | Vitamin D-3 (added), IU/g     | 1.0   |
| Linoleic Acid, %                    | 5.72        | Vitamin E, IU/kg              | 50.0  |
| Linolenic Acid, %                   | 0.09        | Vitamin K (as menadione), ppm | 0.50  |
| Arachidonic Acid, %                 | 0.00        | Thiamin Hydrochloride, ppm    | 6.1   |
| Omega-3 Fatty Acids, %              | 0.09        | Riboflavin, ppm               | 6.7   |
| Total Saturated Fatty A             | 1.27        | Niacin, ppm                   | 30    |
| Total Monounsaturated               |             | Pantothenic Acid, ppm         | 16    |
| Fatty Acids, %                      | 2.42        | Folic Acid, ppm               | 2.1   |
| Polyunsaturated Fatty Acids, %      | 5.81        | Pyridoxine, ppm               | 5.8   |
|                                     |             | Biotin, ppm                   | 0.2   |
| <b>Fiber (max), %</b>               | <b>3.8</b>  | Vitamin B-12, mcg/kg          | 14    |
|                                     |             | Choline Chloride, ppm         | 1,000 |
| <b>Carbohydrates, %</b>             | <b>62.8</b> | Ascorbic Acid, ppm            | 0.0   |
| <b>Energy (kcal/g)</b> <sup>2</sup> | <b>4.11</b> |                               |       |
| <b>From:</b>                        | <b>kcal</b> | <b>%</b>                      |       |
| Protein                             | 0.720       | 17.4                          |       |
| Fat (ether extract)                 | 0.907       | 21.9                          |       |
| Carbohydrates                       | 2.513       | 60.7                          |       |

1. Based on the latest ingredient analysis information. Since nutrient composition of natural ingredients varies, analysis will differ accordingly. Nutrients expressed as percent of ration on an As-Fed basis except where otherwise indicated.

2. Energy (kcal/gm) - Sum of decimal fractions of protein, fat and carbohydrate x 4,9,4 kcal/gm respectively.

Supplemental Table 2

Modest Protein Restriction Diet - 10% Fat & 9% Protein

**NUTRITIONAL PROFILE** <sup>1</sup>

|                                     |             |                               |       |
|-------------------------------------|-------------|-------------------------------|-------|
| <b>Protein, %</b>                   | <b>9.0</b>  | <b>Minerals</b>               |       |
| Arginine, %                         | 0.33        | Calcium, %                    | 0.52  |
| Histidine, %                        | 0.24        | Phosphorus, %                 | 0.48  |
| Isoleucine, %                       | 0.45        | Phosphorus (available), %     | 0.47  |
| Leucine, %                          | 0.80        | Potassium, %                  | 0.36  |
| Lysine, %                           | 0.68        | Magnesium, %                  | 0.05  |
| Methionine, %                       | 0.74        | Sodium, %                     | 0.13  |
| Cystine, %                          | 0.03        | Chloride, %                   | 0.21  |
| Phenylalanine, %                    | 0.45        | Fluorine, ppm                 | 0.0   |
| Tyrosine, %                         | 0.47        | Iron, ppm                     | 35    |
| Threonine, %                        | 0.36        | Zinc, ppm                     | 32    |
| Tryptophan, %                       | 0.10        | Manganese, ppm                | 59    |
| Valine, %                           | 0.53        | Copper, ppm                   | 6.0   |
| Alanine, %                          | 0.26        | Cobalt, ppm                   | 0.0   |
| Aspartic Acid, %                    | 0.60        | Iodine, ppm                   | 0.21  |
| Glutamic Acid, %                    | 1.90        | Chromium, ppm                 | 2.0   |
| Glycine, %                          | 0.18        | Molybdenum, ppm               | 0.00  |
| Proline, %                          | 1.10        | Selenium, ppm                 | 0.11  |
| Serine, %                           | 0.51        |                               |       |
| Taurine, %                          | 0.00        | <b>Vitamins</b>               |       |
| <b>Fat, %</b>                       | <b>10.1</b> | Vitamin A, IU/g               | 4.0   |
| Cholesterol, ppm                    | 0           | Vitamin D-3 (added), IU/g     | 1.0   |
| Linoleic Acid, %                    | 5.72        | Vitamin E, IU/kg              | 50.0  |
| Linolenic Acid, %                   | 0.09        | Vitamin K (as menadione), ppm | 0.50  |
| Arachidonic Acid, %                 | 0.00        | Thiamin Hydrochloride, ppm    | 6.0   |
| Omega-3 Fatty Acids, %              | 0.09        | Riboflavin, ppm               | 6.3   |
| Total Saturated Fatty A             | 1.27        | Niacin, ppm                   | 30    |
| Total Monounsaturated               |             | Pantothenic Acid, ppm         | 15    |
| Fatty Acids, %                      | 2.42        | Folic Acid, ppm               | 2.1   |
| Polyunsaturated Fatty Acids, %      | 5.81        | Pyridoxine, ppm               | 5.8   |
|                                     |             | Biotin, ppm                   | 0.2   |
| <b>Fiber (max), %</b>               | <b>5.0</b>  | Vitamin B-12, mcg/kg          | 12    |
|                                     |             | Choline Chloride, ppm         | 1,000 |
| <b>Carbohydrates, %</b>             | <b>71.9</b> | Ascorbic Acid, ppm            | 0.0   |
| <b>Energy (kcal/g)</b> <sup>2</sup> | <b>4.12</b> |                               |       |
| <b>From:</b>                        | <b>kcal</b> | <b>%</b>                      |       |
| Protein                             | 0.360       | 8.7                           |       |
| Fat (ether extract)                 | 0.909       | 21.9                          |       |
| Carbohydrates                       | 2.876       | 69.4                          |       |

1. Based on the latest ingredient analysis information. Since nutrient composition of natural ingredients varies, analysis will differ accordingly. Nutrients expressed as percent of ration on an As-Fed basis except where otherwise indicated.

2. Energy (kcal/gm) - Sum of decimal fractions of protein, fat and carbohydrate x 4,9,4 kcal/gm respectively.
